# Supplementary material for: Influence of genetic variants on renal uric acid handling in response to frusemide: an acute intervention study
Source: PubMed Central journal article supplement — RMD Open. 2017 Apr 11;3(1):e000424. doi: 10.1136/rmdopen-2016-000424 (PMC5611711; doi:10.1136/rmdopen-2016-000424), 2017-04-11

## SUPPLEMENTARY FIGURE LEGEND

**Supplementary Figure 1.** Fractional excretion (FE) of uric acid and serum urate concentrations over the study period, based on the presence or absence of the *SLC2A9* *rs13129697* protective G allele. Data are presented as mean (95% CI). Left panel shows absolute values and right panel shows change in values. Age, sex and ancestry-adjusted p-values are shown.

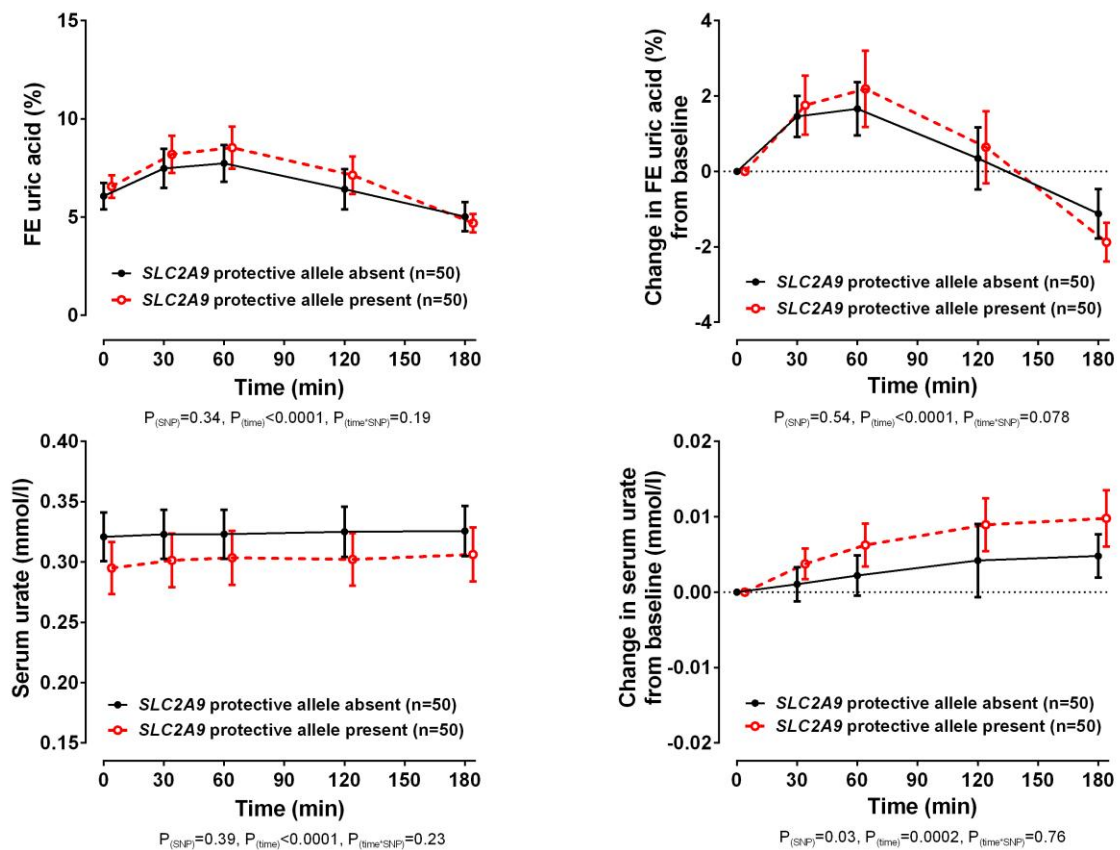

Supplement: rmdopen-2016-000424supp002.pdf [file rmdopen-2016-000424supp002.pdf]
