# Supplementary material for: Influence of genetic variants on renal uric acid handling in response to frusemide: an acute intervention study
Source: PubMed Central journal article supplement — RMD Open. 2017 Apr 11;3(1):e000424. doi: 10.1136/rmdopen-2016-000424 (PMC5611711; doi:10.1136/rmdopen-2016-000424), 2017-04-11
Supplement: rmdopen-2016-000424supp003.pdf [file rmdopen-2016-000424supp003.pdf]

**Supplementary Table 1.** Study visit timeline

|                                                     | <b>Arrival<br/>0800</b> | <b>Baseline<br/>0900</b> | <b>30 minutes<br/>after ingestion</b> | <b>60 minutes<br/>after ingestion</b> | <b>120 minutes<br/>after ingestion</b> | <b>180 minutes<br/>after ingestion</b> |
|-----------------------------------------------------|-------------------------|--------------------------|---------------------------------------|---------------------------------------|----------------------------------------|----------------------------------------|
| <b>Standard light breakfast</b>                     | x                       |                          |                                       |                                       |                                        |                                        |
| <b>Insertion of iv cannula</b>                      |                         | x                        |                                       |                                       |                                        |                                        |
| <b>Intake of frusemide 40mg tablet</b>              |                         | x                        |                                       |                                       |                                        |                                        |
| <b>Blood sample</b>                                 |                         | 30ml                     | 15ml                                  | 15ml                                  | 15ml                                   | 15ml                                   |
| <b>Urine sample</b>                                 |                         | x                        | x                                     | x                                     | x                                      | x                                      |
| <b>Blood pressure measurement</b>                   |                         | x                        | x                                     | x                                     | x                                      | x                                      |
| <b>Water ingestion</b>                              | 500ml                   |                          |                                       |                                       |                                        |                                        |
| <b>Water ingestion (equivalent to urine volume)</b> |                         | x                        | x                                     | x                                     | x                                      | x                                      |

**Supplementary Table 2.** *SLC2A9* rs11942223 analysis based on ancestral groups. ANCOVA p-values are shown (adjusted for age, sex, and baseline FEUA or serum urate as appropriate).

|                          |                       | <b>Change in FEUA</b> | <b>Change in serum urate</b> |
|--------------------------|-----------------------|-----------------------|------------------------------|
| <b>Māori and Pacific</b> | P <sub>SNP</sub>      | 0.23                  | 0.66                         |
|                          | P <sub>time</sub>     | <0.0001               | 0.03                         |
|                          | P <sub>time*SNP</sub> | 0.29                  | 0.09                         |
| <b>European</b>          | P <sub>SNP</sub>      | 0.52                  | 0.27                         |
|                          | P <sub>time</sub>     | <0.0001               | 0.19                         |
|                          | P <sub>time*SNP</sub> | 0.10                  | 0.44                         |

**Supplementary Table 3.** *SLC2A9* rs13129697 analysis based on ancestral groups. ANCOVA p-values are shown (adjusted for age, sex, and baseline FEUA or serum urate as appropriate).

|                          |                       | <b>Change in FEUA</b> | <b>Change in serum urate</b> |
|--------------------------|-----------------------|-----------------------|------------------------------|
| <b>Māori and Pacific</b> | P <sub>SNP</sub>      | 0.39                  | 0.03                         |
|                          | P <sub>time</sub>     | <0.0001               | 0.0006                       |
|                          | P <sub>time*SNP</sub> | 0.45                  | 0.67                         |
| <b>European</b>          | P <sub>SNP</sub>      | 0.99                  | 0.57                         |
|                          | P <sub>time</sub>     | <0.0001               | 0.15                         |
|                          | P <sub>time*SNP</sub> | 0.18                  | 0.51                         |

**Supplementary Table 4.** *SLC22A11* rs2078267 analysis based on ancestral groups. ANCOVA p-values are shown (adjusted for age, sex, and baseline FEUA or serum urate as appropriate).

|                          |                       | <b>Change in FEUA</b> | <b>Change in serum urate</b> |
|--------------------------|-----------------------|-----------------------|------------------------------|
| <b>Māori and Pacific</b> | P <sub>SNP</sub>      | 0.86                  | 0.85                         |
|                          | P <sub>time</sub>     | <0.0001               | 0.0023                       |
|                          | P <sub>time*SNP</sub> | 0.71                  | 0.081                        |
| <b>European</b>          | P <sub>SNP</sub>      | 0.10                  | 0.54                         |
|                          | P <sub>time</sub>     | <0.0001               | 0.13                         |
|                          | P <sub>time*SNP</sub> | 0.38                  | 0.06                         |

**Supplementary Table 5.** Correlations with change in fractional excretion of uric acid and serum urate concentrations at 60 and 180 minutes after frusemide intake.

|                                      |          | <b>Change in FEUA<br/>60 min</b> | <b>Change in FEUA 180<br/>min</b> | <b>Change in serum urate<br/>60 min</b> | <b>Change in serum urate<br/>180 min</b> |
|--------------------------------------|----------|----------------------------------|-----------------------------------|-----------------------------------------|------------------------------------------|
| <b>Change in FEUA 60 min</b>         | <b>r</b> | -                                | 0.19                              | -0.09                                   | -0.17                                    |
|                                      | <b>P</b> |                                  | 0.06                              | 0.41                                    | 0.10                                     |
| <b>Change in FEUA 180 min</b>        | <b>r</b> | 0.19                             | -                                 | -0.07                                   | <b>-0.27</b>                             |
|                                      | <b>P</b> | 0.06                             |                                   | 0.50                                    | <b>0.009</b>                             |
| <b>Change in serum urate 60 min</b>  | <b>r</b> | -0.09                            | -0.07                             | -                                       | <b>0.62</b>                              |
|                                      | <b>P</b> | 0.41                             | 0.50                              |                                         | <b>&lt;0.0001</b>                        |
| <b>Change in serum urate 180 min</b> | <b>r</b> | -0.17                            | <b>-0.27</b>                      | <b>0.62</b>                             | -                                        |
|                                      | <b>P</b> | 0.10                             | <b>0.009</b>                      | <b>&lt;0.0001</b>                       |                                          |
| <b>Change in FENa 60 minutes</b>     | <b>r</b> | <b>0.40</b>                      | <b>-0.28</b>                      | <b>0.44</b>                             | 0.18                                     |
|                                      | <b>P</b> | <b>&lt;0.0001</b>                | <b>0.006</b>                      | <b>&lt;0.0001</b>                       | 0.07                                     |
| <b>Change in FENa 180 minutes</b>    | <b>r</b> | 0.16                             | <b>0.45</b>                       | <b>-0.28</b>                            | -0.04                                    |
|                                      | <b>P</b> | 0.12                             | <b>&lt;0.0001</b>                 | <b>0.01</b>                             | 0.71                                     |
| <b>Change in FEK 60 minutes</b>      | <b>r</b> | 0.19                             | -0.14                             | <b>0.26</b>                             | 0.12                                     |
|                                      | <b>P</b> | 0.06                             | 0.18                              | <b>0.01</b>                             | 0.23                                     |
| <b>Change in FEK 180minutes</b>      | <b>r</b> | -0.04                            | <b>0.33</b>                       | -0.12                                   | -0.04                                    |
|                                      | <b>P</b> | 0.70                             | <b>0.0008</b>                     | 0.25                                    | 0.70                                     |
| <b>Urine volume 60 min</b>           | <b>r</b> | 0.10                             | <b>-0.34</b>                      | <b>0.35</b>                             | 0.08                                     |
|                                      | <b>P</b> | 0.31                             | <b>0.0006</b>                     | <b>0.0005</b>                           | 0.45                                     |
| <b>Urine volume 180 min</b>          | <b>r</b> | 0.13                             | 0.01                              | -0.09                                   | -0.15                                    |
|                                      | <b>P</b> | 0.21                             | 0.89                              | 0.41                                    | 0.16                                     |

**Supplementary Table 6.** Stepwise regression models examining independent variables associated with change in fractional excretion of uric acid and serum urate concentrations at 60 and 180 minutes after frusemide intake. Variables with  $P < 0.05$  in the correlation analysis were included in the regression analysis. For the dependent variables measured at 60 minutes, only variables measured at 60 minutes were included in the regression model.

| <b>Dependent variable</b>                   | <b>Predictors</b>                                                    | <b>Standardized <math>\beta</math></b> | <b>Partial <math>R^2</math> change</b> | <b>P</b>        | <b>Model</b>                            | <b>Variables not included in final model</b>                                                |
|---------------------------------------------|----------------------------------------------------------------------|----------------------------------------|----------------------------------------|-----------------|-----------------------------------------|---------------------------------------------------------------------------------------------|
| <b>Change in FEUA at 60 minutes</b>         | Change in FENa at 60 minutes                                         | 0.40                                   | 0.16                                   | <0.001          | $R^2=0.16$ ; $F=17.9$ ;<br>$P < 0.0001$ | -                                                                                           |
| <b>Change in FEUA at 180 minutes</b>        | Change in FENa at 180 minutes                                        | 0.46                                   | 0.21                                   | <0.001          | $R^2=0.21$ ; $F=24.2$ ;<br>$P < 0.0001$ | Change in FEUA at 60 minutes<br>Change in FEK at 180 minutes<br>Urine volume at 180 minutes |
| <b>Change in serum urate at 60 minutes</b>  | Change in FENa at 60 minutes                                         | 0.44                                   | 0.18                                   | <0.001          | $R^2=0.18$ ; $F=22.4$ ;<br>$P < 0.0001$ | Change in FEK at 60 minutes<br>Urine volume at 60 minutes                                   |
| <b>Change in serum urate at 180 minutes</b> | Change in serum urate at 60 minutes<br>Change in FEUA at 180 minutes | 0.59<br>-0.21                          | 0.37<br>0.05                           | <0.001<br>0.009 | $R^2=0.41$ ; $F=32.4$ ;<br>$P < 0.0001$ | -                                                                                           |
